# Supplementary material for: Oncogene-induced senescence in hematopoietic progenitors features myeloid restricted hematopoiesis, chronic inflammation and histiocytosis
Source: PubMed Central journal article supplement (PMC8316479; doi:10.1038/s41467-021-24876-1), 2021-07-27
Supplement: 41467_2021_24876_MOESM1_ESM.pdf [file 41467_2021_24876_MOESM1_ESM.pdf]

# Oncogene-induced senescence in hematopoietic progenitors features myeloid restricted hematopoiesis, chronic inflammation and histiocytosis

Riccardo Biavasco, Emanuele Lettera, Kety Giannetti, Diego Gilioli, Stefano Beretta, Anastasia Conti, Serena Scala, Daniela Cesana, Pierangela Gallina, Margherita Norelli, Luca Basso-Ricci, Attilio Bondanza, Giulio Cavalli, Ponzoni Maurilio, Lorenzo Dagna, Claudio Doglioni, Aiuti Alessandro, Ivan Merelli, Raffaella Di Micco and Eugenio Montini.

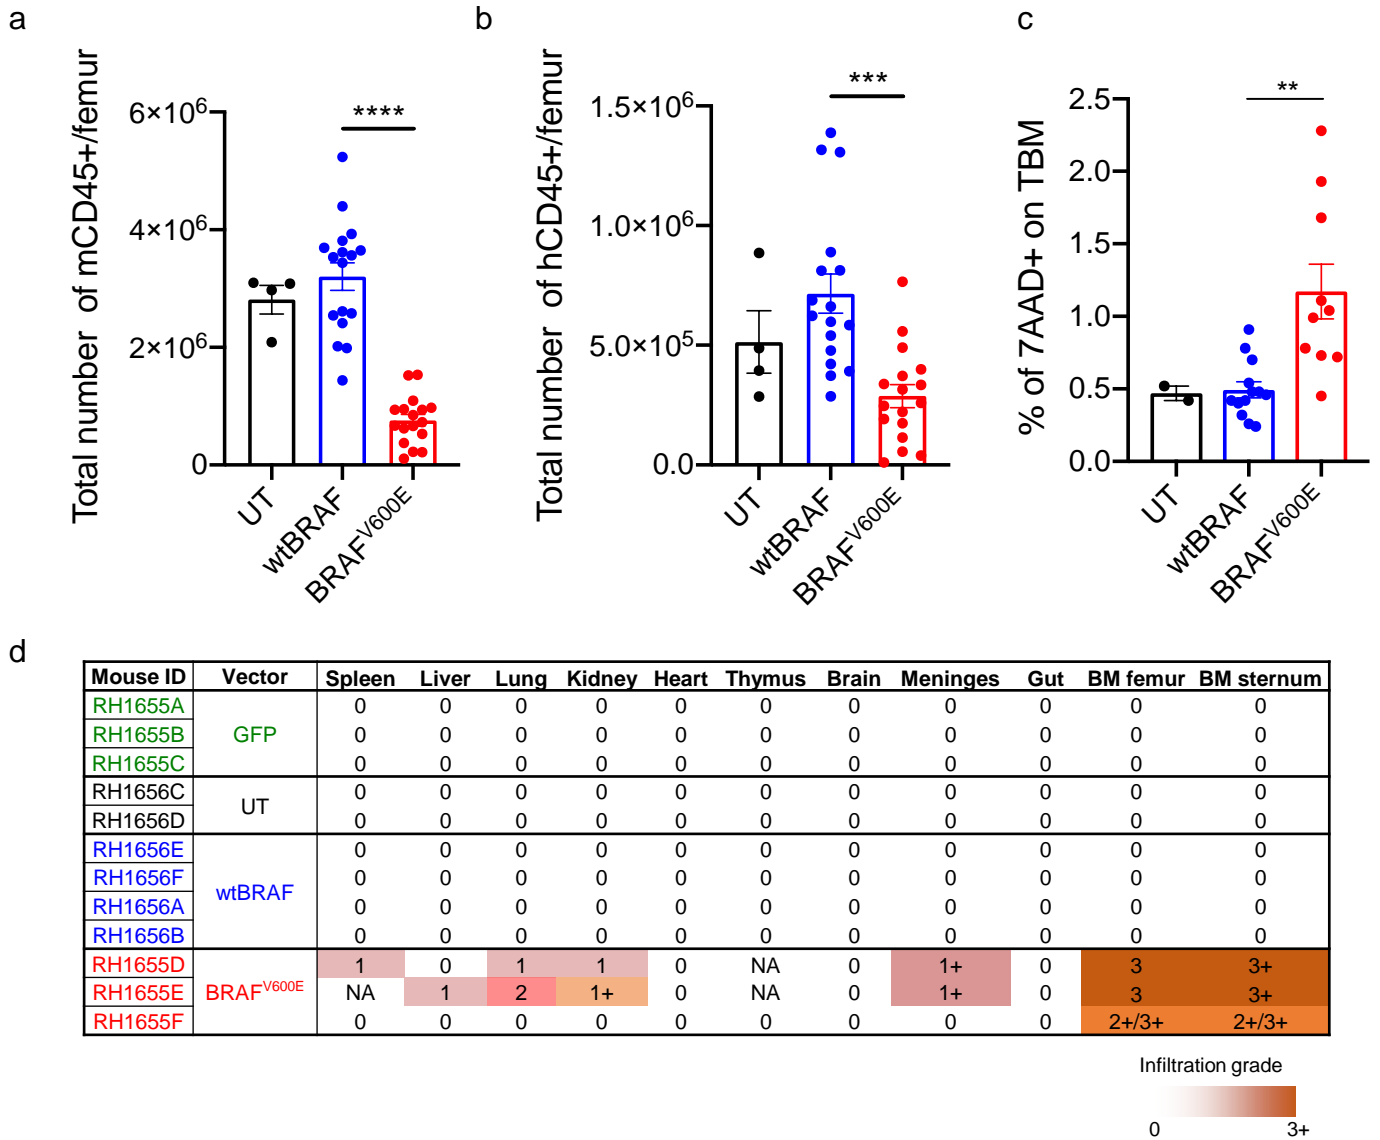

Supplementary Figure 1. Bone marrow cellularity and infiltration grade of organs in transplanted mice at euthanasia. a, b) Total number of murine (a) and human (b) CD45<sup>+</sup> (mCD45<sup>+</sup> and hCD45 respectively) cells *per* femur from mice wtBRAF (n=17 animals), BRAF<sup>V600E</sup> (n=17 animals) and UT (n=4 animals) groups (euthanized at 24 days after transplant). Data are presented as mean value±SEM. Statistical test: Kruskal-Wallis with Dunn's multiple comparisons \*\*\*\*p<0.0001, \*\*\*p<0.001. c) Relative percent of necrotic cells (7AAD<sup>+</sup>) on total bone marrow of mice transplanted from wtBRAF (n=13 animals), BRAF<sup>V600E</sup> (n=10 animals) and UT (n=2 animals) groups (euthanized at 24 days after transplant). Data are presented as mean value±SEM. Statistical test: Kruskal-Wallis with Dunn's multiple comparisons. \*\*p<0.005 (p=0.0027). d) The indicated organs were collected at euthanasia from mice transplanted with HSPCs transduced with a vector expressing GFP (GFP), or wild type BRAF (wtBRAF), mutated BRAF<sup>V600E</sup> or untransduced cells (UT). Two independent pathologists evaluated the infiltration grade and provided the score. All graphs in this figure display data from UT group in black, wtBRAF in blue and from BRAF<sup>V600E</sup> in red.

a

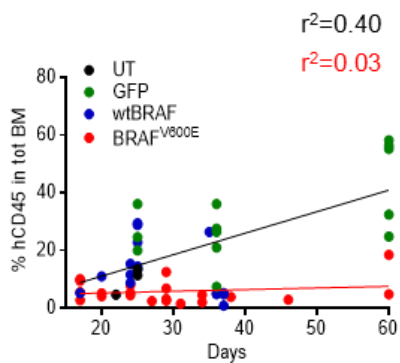

b

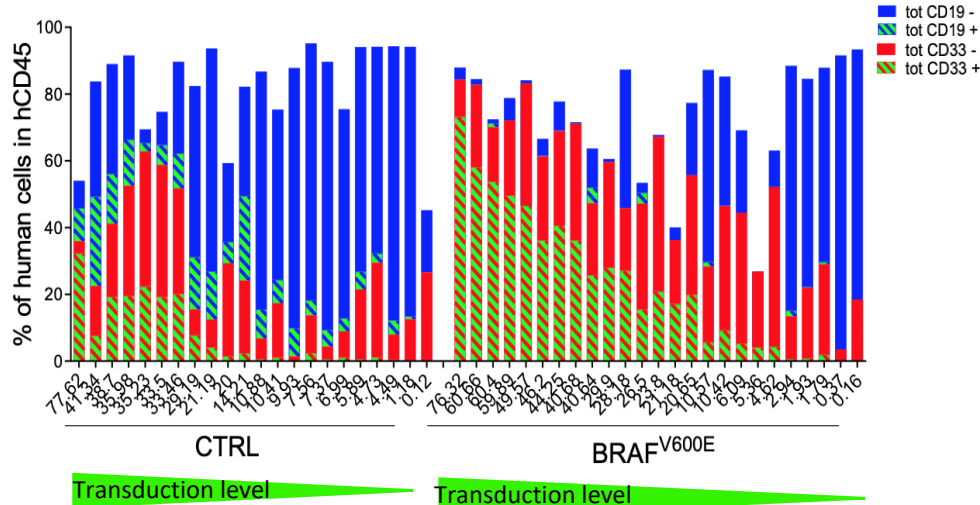

c

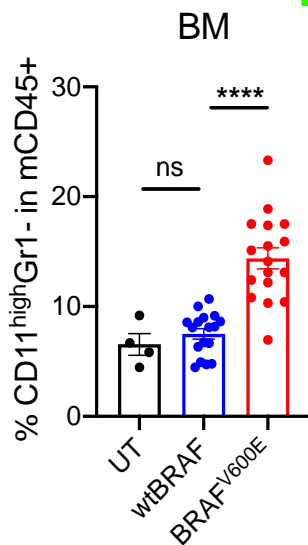

d

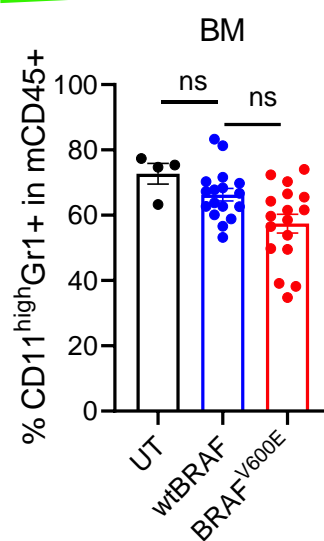

e

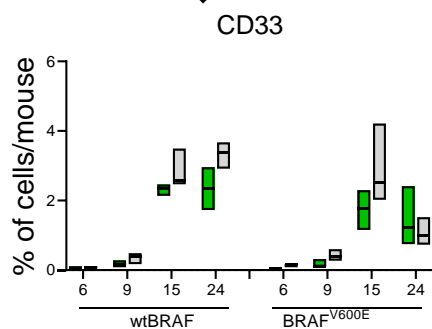

f

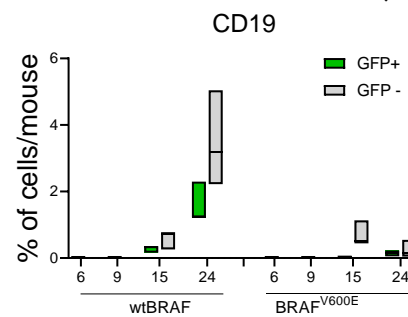

g

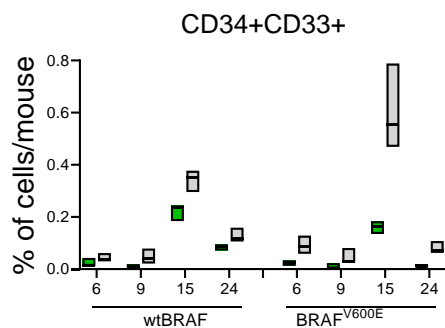

h

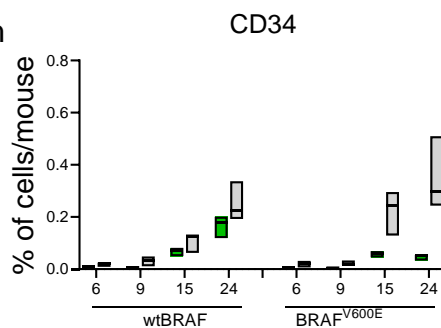

Supplementary Figure 2. Impact of oncogene activation on murine and human HSPC subpopulations. a) Engraftment levels of human CD45<sup>+</sup> cells in bone marrow (BM) of individual mice at the time of euthanasia shown in Figure 2b. Trendlines of the engraftment levels for controls (black) and mice from the BRAF<sup>V600E</sup> group (red) are shown. Goodness of fit measured as R<sup>2</sup>. b) Percentage of GFP<sup>+</sup> and GFP<sup>-</sup> myeloid (CD33<sup>+</sup>) and B (CD19<sup>+</sup>) cells within hCD45<sup>+</sup> cells at time of euthanasia. Values on x-axis were ordered by transduction level. c, d) percentage of c) mouse monocytic/macrophagic lineage cells (CD11<sup>+</sup>high/Gr1<sup>-</sup>/mCD45<sup>+</sup>) or d) mouse granulocytes (CD11<sup>+</sup>high/Gr1<sup>+</sup>/mCD45<sup>+</sup>) from wtBRAF (blue, n=17 mice) and BRAF<sup>V600E</sup> (red, n=17 mice) group compared to control groups (UT, black, n=4 mice). Data are presented as mean value±SEM. Statistical test: Kruskal-Wallis with Dunn's multiple comparisons. \*\*\*\*p<0.0001, ns: not significant. e-h) Relative percentage of GFP<sup>+</sup> (green plots) and GFP<sup>-</sup> (grey plots) human cells (CD33, CD19, CD34<sup>+</sup>/CD33<sup>+</sup>, CD34<sup>+</sup>) on total BM at the indicated time points from wtBRAF and BRAF<sup>V600E</sup> transplantation groups. n=3 mice for each time point.

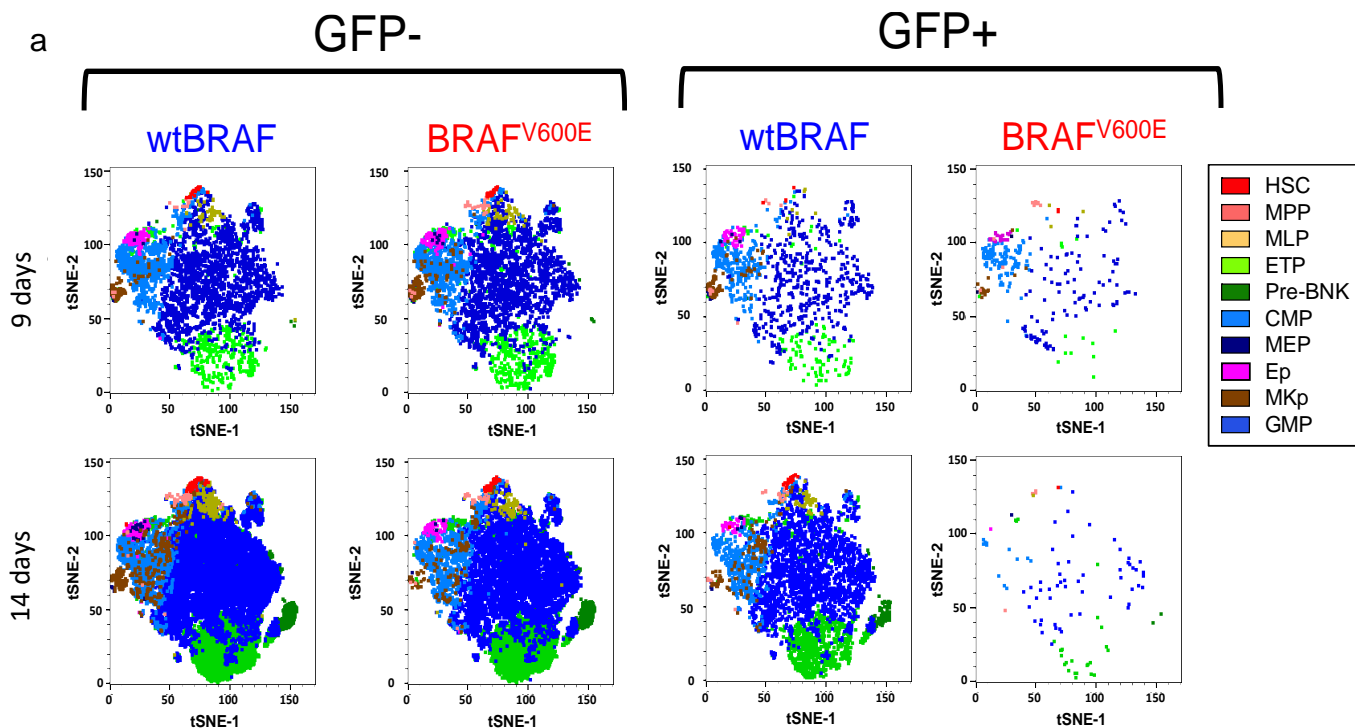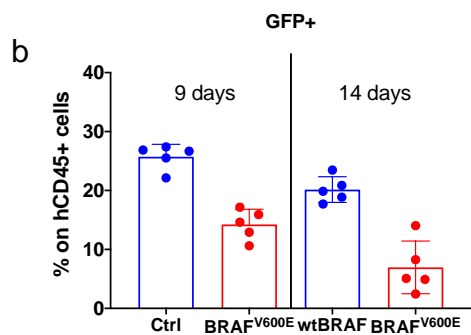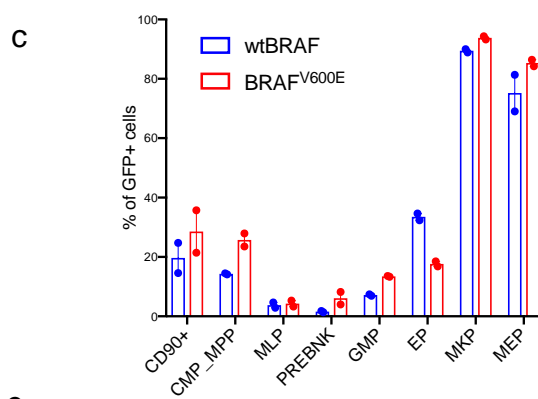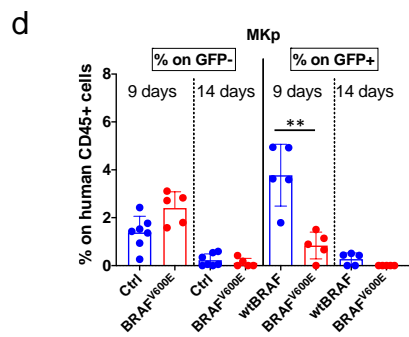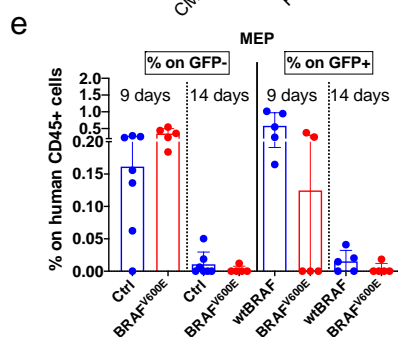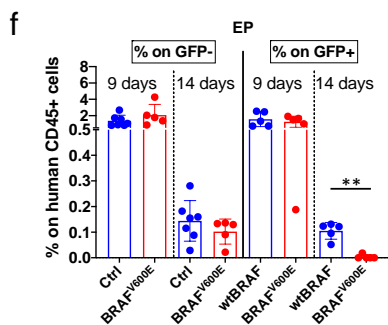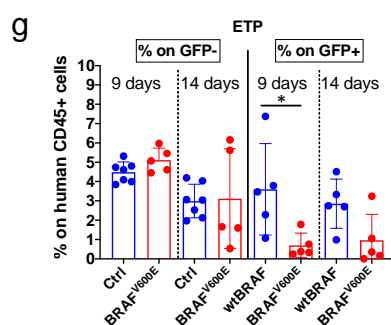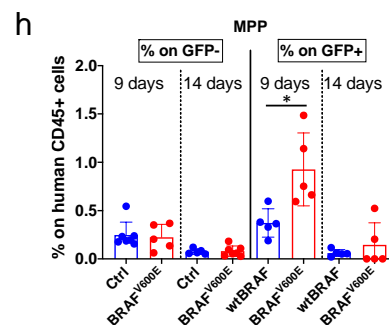

Supplementary Figure 3. Impact of oncogene activation on HSPC subpopulations frequency.

a) tSNE analysis based on the surface expression of the whole blood dissection (WBD) HSPC markers. Cells were colored according to the gating strategy definition. All human CD45 events of both wtBRAF and BRAF<sup>V600E</sup> experimental groups were analyzed together and then stratified based on GFP expression. The composition of HSPCs is similar in all the samples analyzed; however, mice transplanted with BRAF<sup>V600E</sup>-expressing HSPCs show a progressive loss of most HSPC subsets.

b) Levels of transduction (percent of GFP<sup>+</sup> within hCD45<sup>+</sup>) in mice from the wtBRAF (blue) and BRAF<sup>V600E</sup> (red) groups relative to Figure 2k-p, (n=5 for each time point). Data are presented as mean value+/-SD.

c) Levels of transduction (percent of GFP<sup>+</sup> cells) in different HSPC subsets (n=2 independent donors) after 120h in vitro post-transduction.

d-h) Percentage of human HSPC subpopulations within GFP<sup>-</sup> and GFP<sup>+</sup> fractions in BM cells isolated from transplanted mice, BRAF<sup>V600E</sup> group in red, CTRL group: cumulative values of mice transplanted with untransduced or wtBRAF-expressing HSPCs, in blue. Mice were euthanized at 9 and 14 days after HSPC transplant. (HSC-enriched fraction=CD90<sup>+</sup>; CMP=Common-Myeloid Progenitors; MPP=Multi-potent progenitors; MLP=multi-lymphoid progenitors; PreBNK=B and NK cell progenitors; GMP=Granulocyte/Monocyte Progenitors; EP=Erythroid progenitors; MKP=Megakaryocyte Progenitors; MEP=Megakaryocyte/Erythrocyte Progenitors; ETP=Early T cell progenitors). n=5 for each time point. Data are presented as mean value+/-SD. Statistical test: Two-tailed Mann-Whitney. \*p<0.05, \*\*p<0.01.

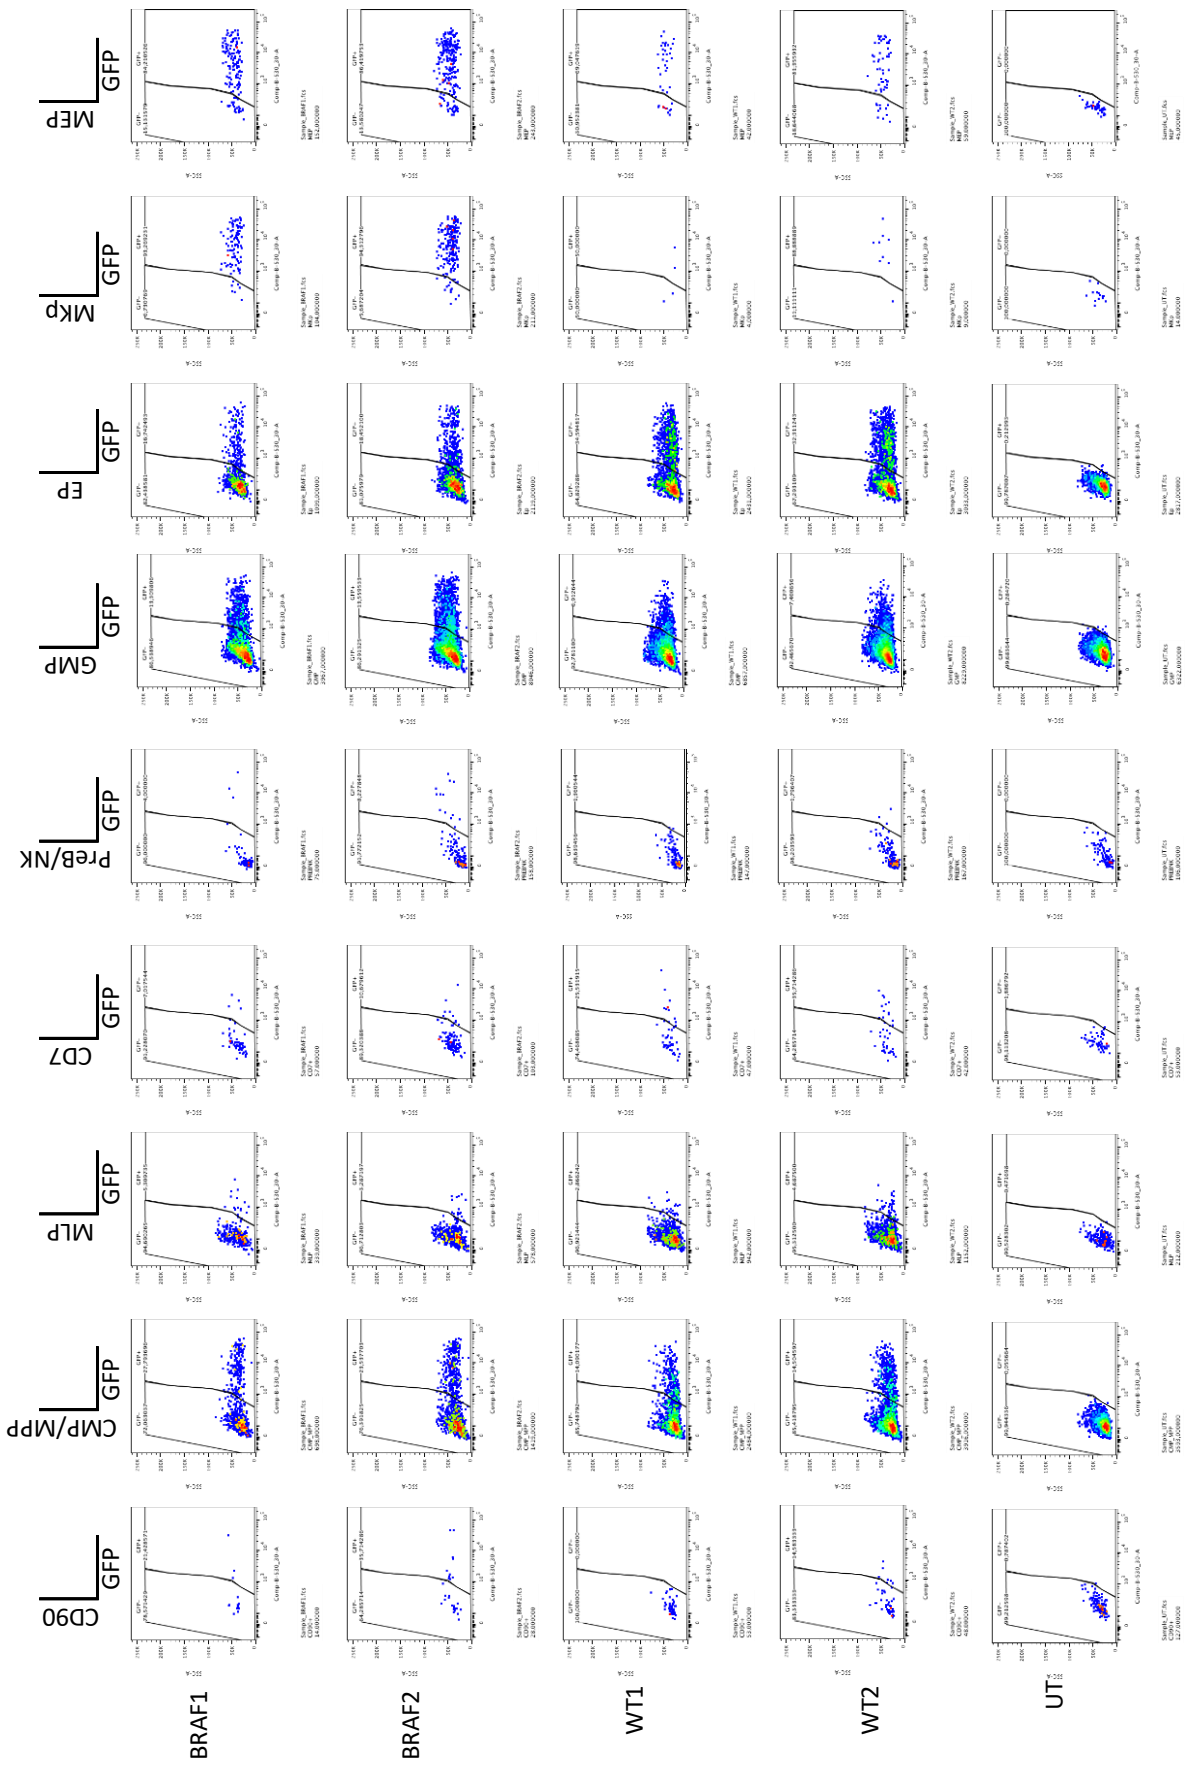

Supplementary Figure 4 Representative FACS plots of the different HSPC subsets analyzed. Fluorophores are indicated in the axis legend, populations marked are shown on the scheme on top of each column. The gating strategy represented in this figure corresponds to FACS data panels in Figure 2k-p and Supplementary Figure 3c-h



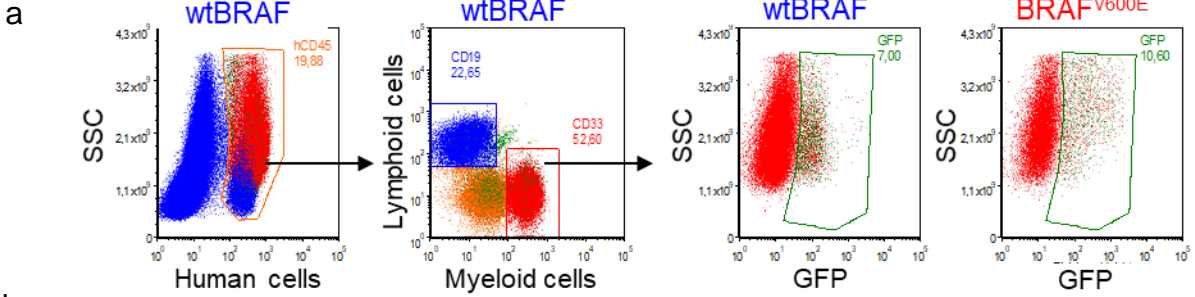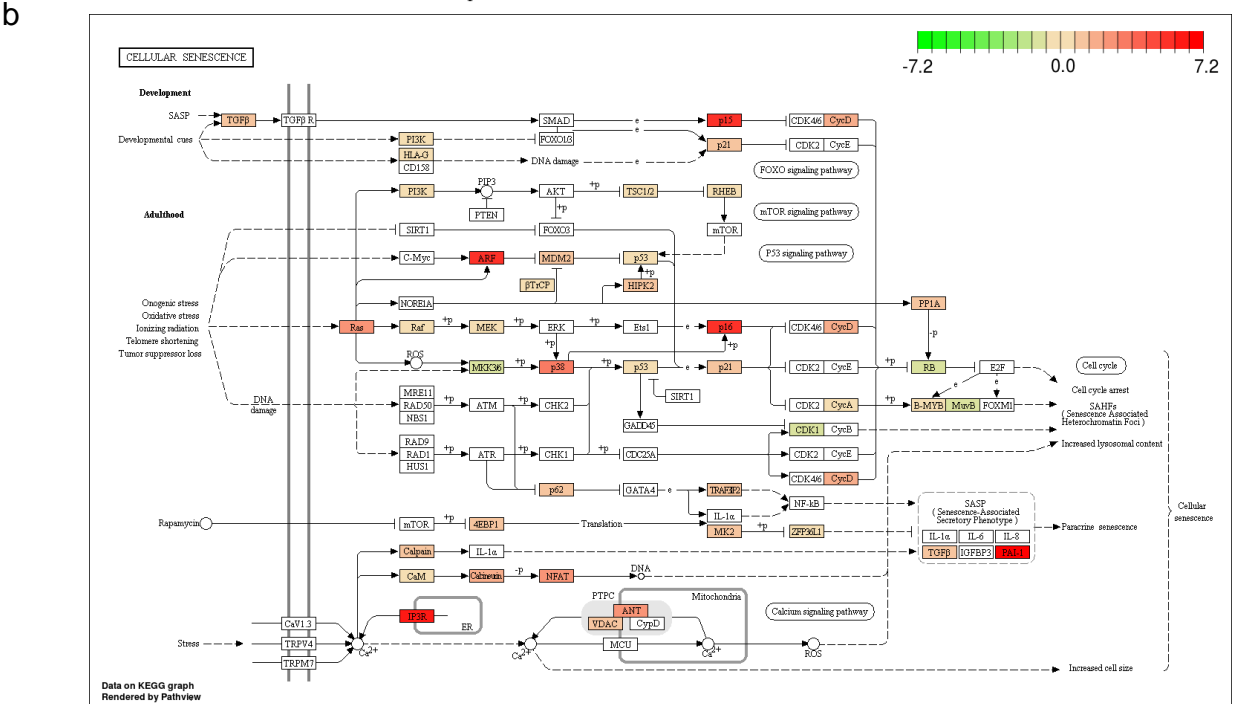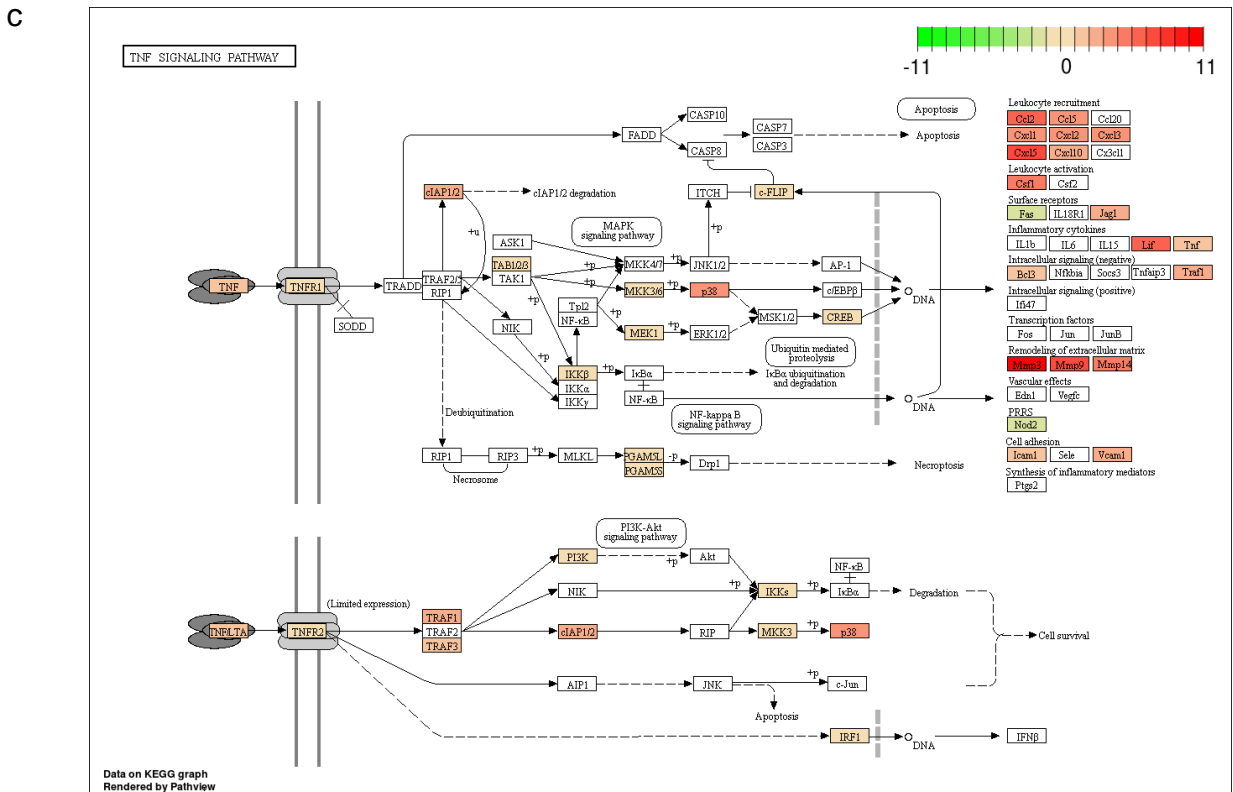

Supplementary Figure 5. Global transcriptomic analyses of oncogene-expressing myeloid cells. a) Sorting strategy for CD33<sup>+</sup>/GFP<sup>+</sup> and CD33<sup>+</sup>/GFP<sup>-</sup> cells for RNA-sequencing analysis. b, c) Schematic representation of the senescence and TNF signaling pathways (using KEGG Graph data) showing Log<sub>2</sub>FC expression of DEGs from BRAF<sup>V600E</sup> group compared to controls.

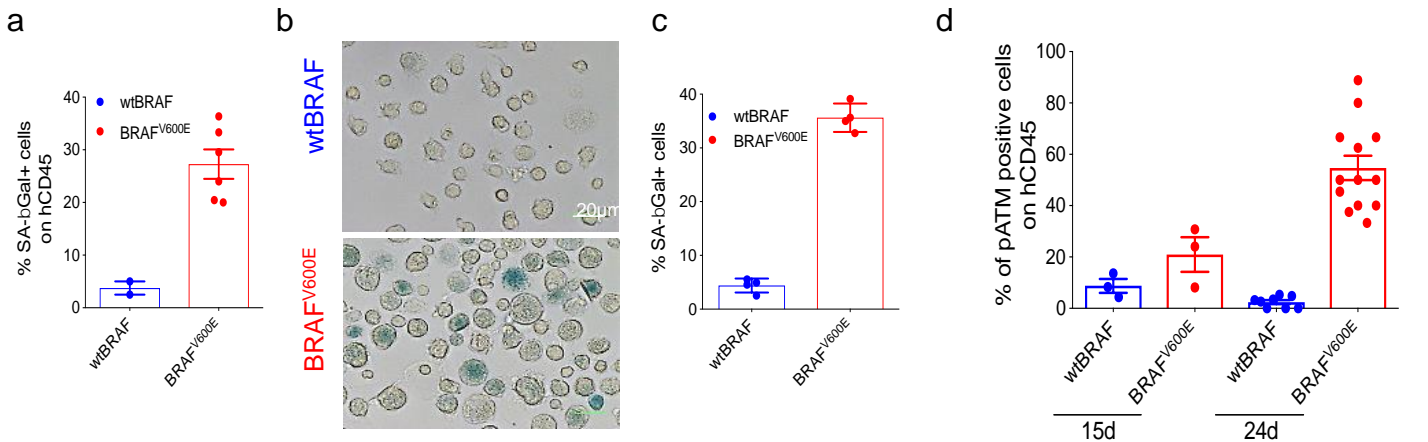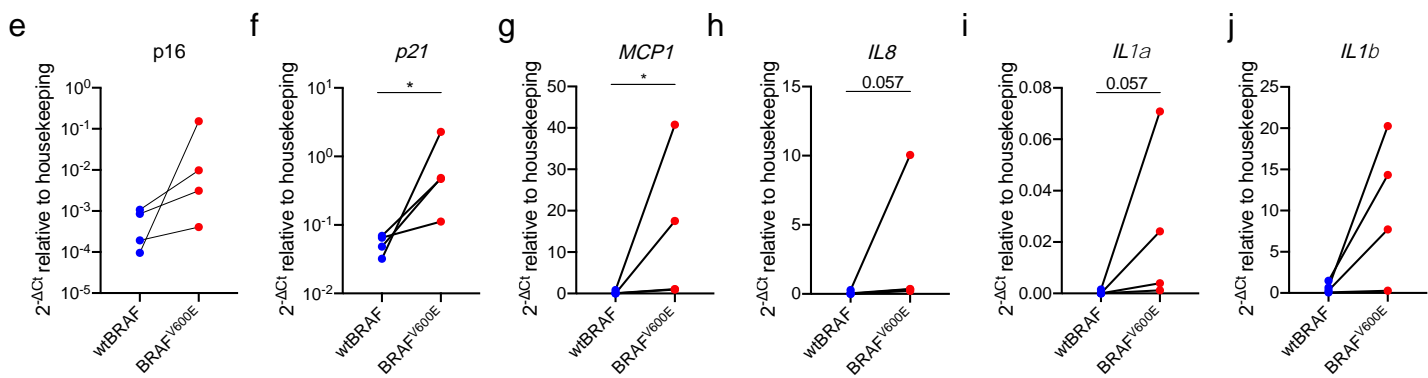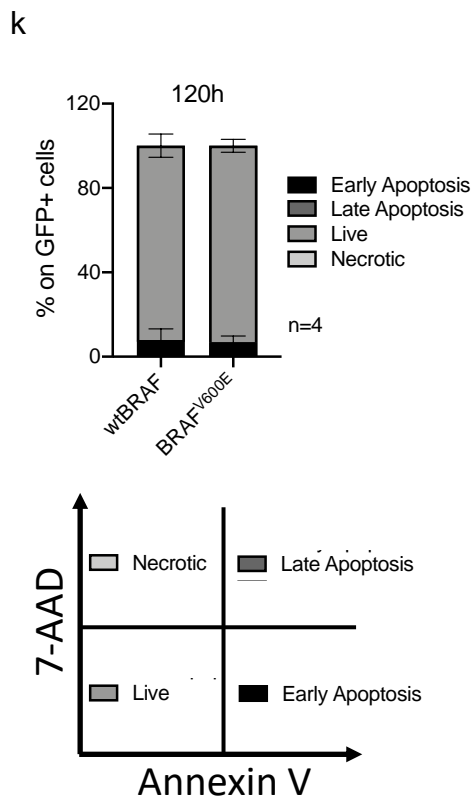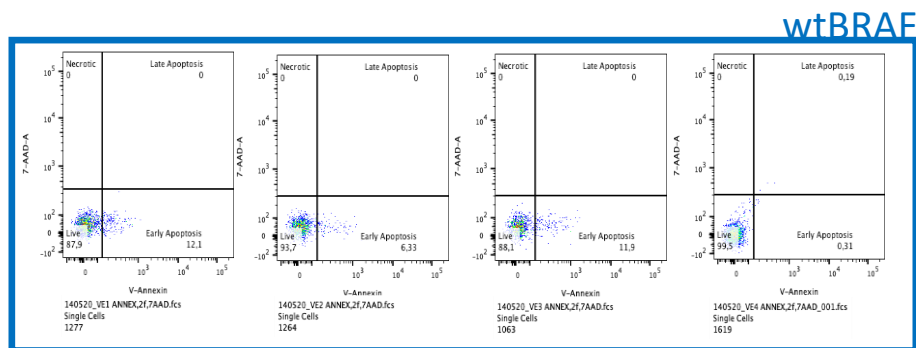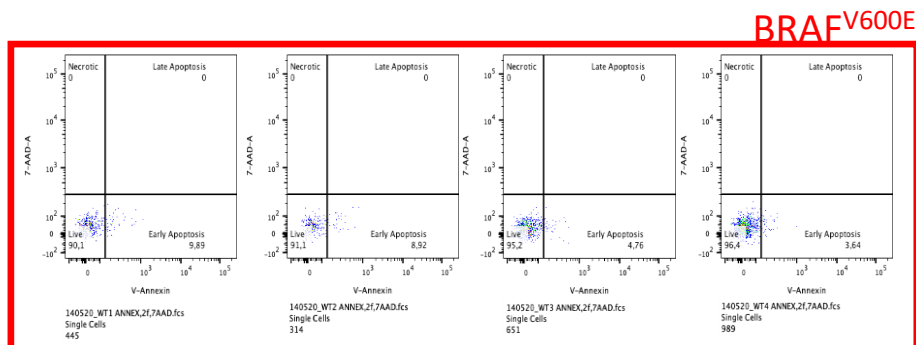

Supplementary Figure 6. BRAF<sup>V600E</sup> expression in HSPCs promotes oncogene-induced senescence. a) Quantification of SA-β-gal positive cells within human CD45<sup>+</sup> cells isolated from BM of mice transplanted with wtBRAF or BRAF<sup>V600E</sup> expressing HSPCs at 24 days post transplantation. Each dot represents an independent measurement from a pool of 3 mice for wtBRAF and BRAF<sup>V600E</sup> groups. Lines indicate mean values±SEM. b) Representative images of SA-β-gal positive cells in wtBRAF and BRAF<sup>V600E</sup>-expressing HSPCs 8 days after transduction in liquid culture. Scale bar=20μm. c) Quantification of SA-β-gal positive cells from (b). Each dot represent and independent donor. d) Percentage of pATM (S1981) positive cells within the human graft (hCD45<sup>+</sup>) in the BM of mice transplanted with wtBRAF and BRAF<sup>V600E</sup>- expressing cells at the indicated time points post-transplantation. Each dot represents independent measurement from a pool of 3 mice for wtBRAF and BRAF<sup>V600E</sup> groups. Lines indicate mean values±SEM. e-j) Relative mRNA expression of cell cycle inhibitors p21 (E, p=0.0286) and p16 (f) and SASP cytokines MCP1 (g, p=0.0286), IL8 (h), IL1α (i), IL1β (j), in wtBRAF and BRAF<sup>V600E</sup>-expressing cells as determined by RT-qPCR at 5 days post-transduction. Gene expression data are represented as 2<sup>-ΔCt</sup> relative to housekeeping gene. Each dot represents an independent donor transduced with wtBRAF (N=4) or BRAF<sup>V600E</sup> (N=4). The connecting lines between dots indicate same donor origin. Statistical test: Two-tailed Mann-Whitney. \*p<0.05. k) Percentage of alive, apoptotic and necrotic cells in *in vitro* cultured HSPCs 120h post transduction with wtBRAF or BRAF<sup>V600E</sup> expressing vectors; the scheme on the bottom left illustrates the gating strategy, the frames on the right (blue for wtBRAF and red for BRAF<sup>V600E</sup>) contain representative FACS plots. Data are presented as mean value+/-SD. All graphs in this figure display data from wtBRAF in blue and from BRAF<sup>V600E</sup> in red.

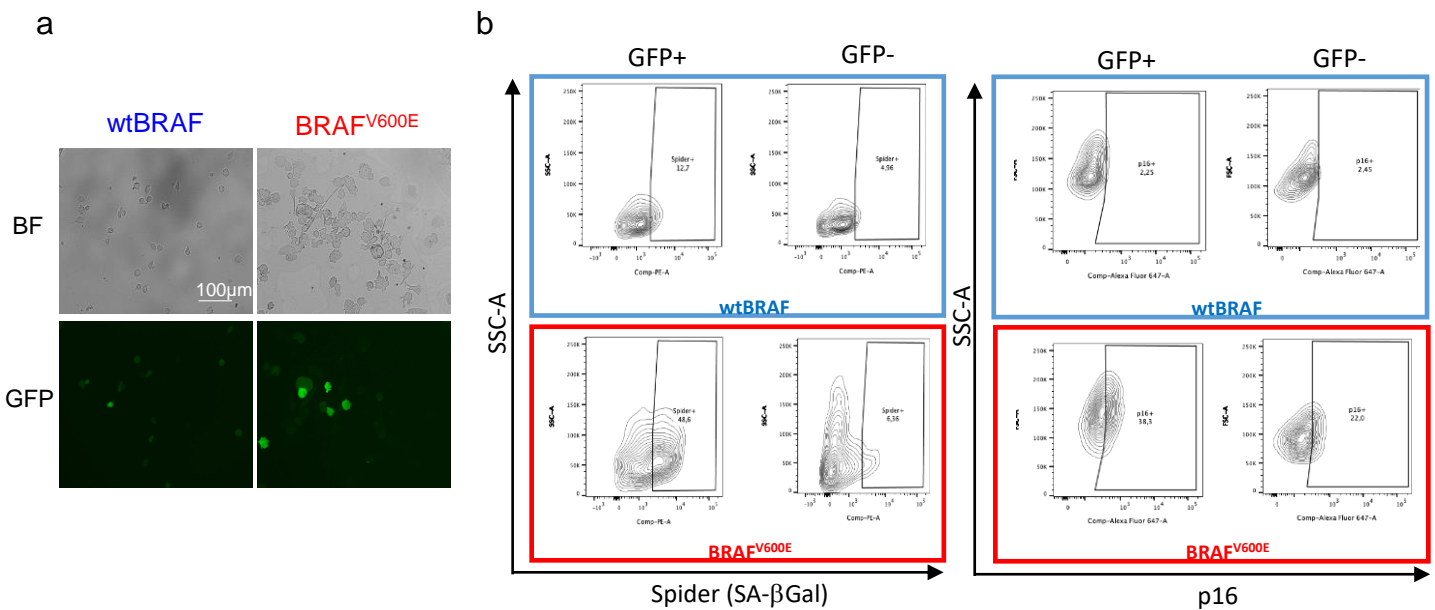

Supplementary Figure 7. BRAF<sup>V600E</sup> expression in HSPCs promotes oncogene-induced senescence through RELA/p65 mediated expression of cytokines. a) Morphological changes in BRAF<sup>V600E</sup>-expressing (GFP<sup>+</sup>) and bystander (GFP<sup>-</sup>) HSPCs compared to control at 9 days post-transduction. BF=Brightfield, GFP indicates transduced cells. Scale bar=100µm. b) Representative FACS plots of the data summarized in Figure 5c, d. c) Immunohistochemical characterization of skin and meninges lesions for expression of the cell cycle inhibitor p16 and myeloid/macrophage markers (CD11c, CD14 and CD68). Scale bar: 200 µm. d) Expression levels of SASP cytokines in BRAF<sup>V600E</sup>-expressing cells upon treatment with a scrambled sequence shRNA control (scr) or shRNA against RELA/p65. Relative mRNA expression was determined by RT-qPCR at 5 days post-transduction and are represented as  $2^{-\Delta Ct}$  relative to housekeeping gene. Each dot represents an independent donor transduced with BRAF<sup>V600E</sup> vector (N=4). The connecting lines between dots indicate same donor origin.

**a**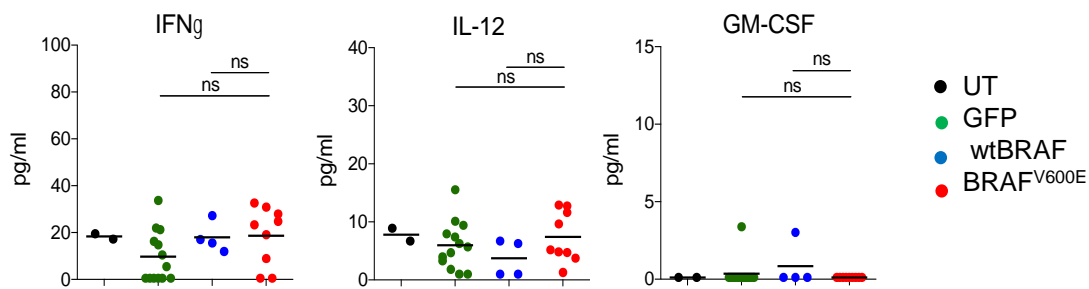**b**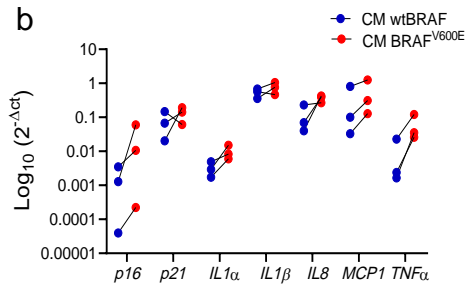**c**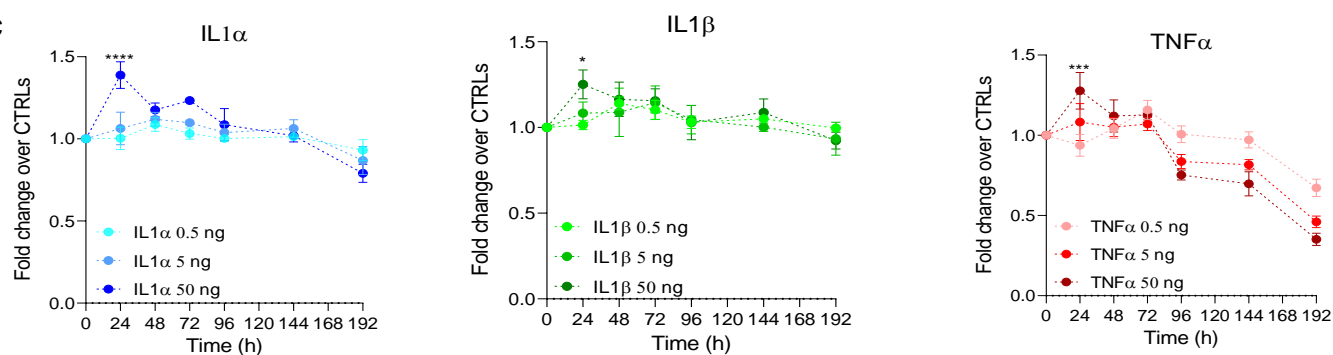**d**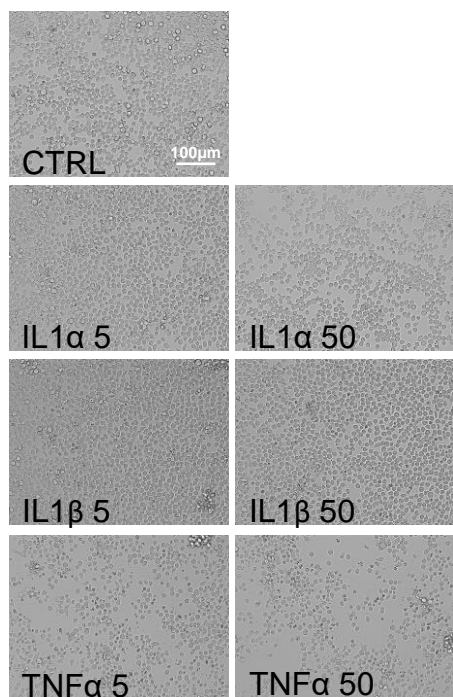**e**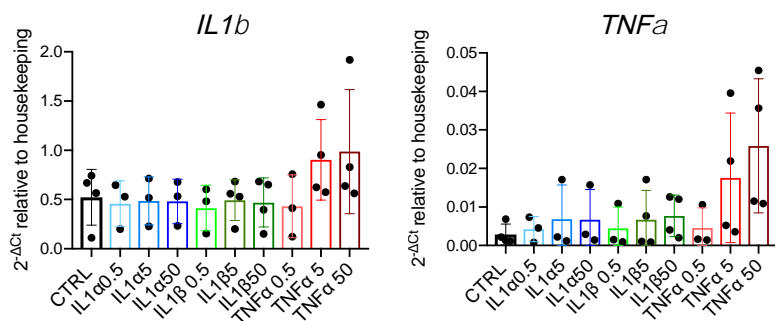

Supplementary Figure 8. Impact of SASP factors on HSPC biology. a) Concentrations of the indicated human pro-inflammatory cytokines in mice transplanted with untransduced (UT, n=2 animals) HSPCs or HSPCs transduced with GFP (n=13), wtBRAF (n=4) or BRAF<sup>V600E</sup> (n=13). Lines represent means. Each dot represents an individual mouse. Statistical test: Kruskal-Wallis with Dunn's multiple comparisons. ns=non significant. b) Gene expression analysis of senescence-associated markers in CM-treated HSPCs. Data are represented as  $2^{-\Delta Ct}$  relative to housekeeping gene. Each dot represents an independent donor. The connecting lines between dots indicate same donor origin (n=3 independent donors). c) Dashed lines indicate the fold change in growth of cytokine (IL1 $\alpha$ , IL1 $\beta$  or TNF $\alpha$ )-treated HSPCs over controls. This is a representation of the data shown in Figure 7f-h. Statistical analysis was performed on data in Figure 7f-h with linear mixed-effects model (LME), see also Source Data file. Technical replicates: CTRL(n=5), IL1 $\alpha$ -IL1 $\beta$ -TNF $\alpha$ (n=4). CTRL values are repeated. Data are presented as mean values $\pm$ SD. d) Representative images of IL1 $\alpha$ , IL1 $\beta$  and TNF $\alpha$  treated HSPCs and untreated controls at 7 days post-treatment. Cytokine concentrations are indicated. Scale bar=100 $\mu$ m. e) Expression levels of IL1 $\beta$  and TNF $\alpha$  in IL1 $\alpha$ , IL1 $\beta$  or TNF $\alpha$ -treated HSPCs and untreated controls at 7 days post-treatment. Dots indicate independent biological replicates (3 independent donors for groups: CTRL, IL1 $\alpha$ 0.5, IL1 $\alpha$ 5, IL1 $\alpha$ 50, IL1 $\beta$ 0.5 and TNF $\alpha$ 0.5; 4 independent donors for groups: IL1 $\beta$ 5, IL1 $\beta$ 50, TNF $\alpha$ 5, TNF $\alpha$ 50). Data are presented as mean $\pm$ SD.



**a**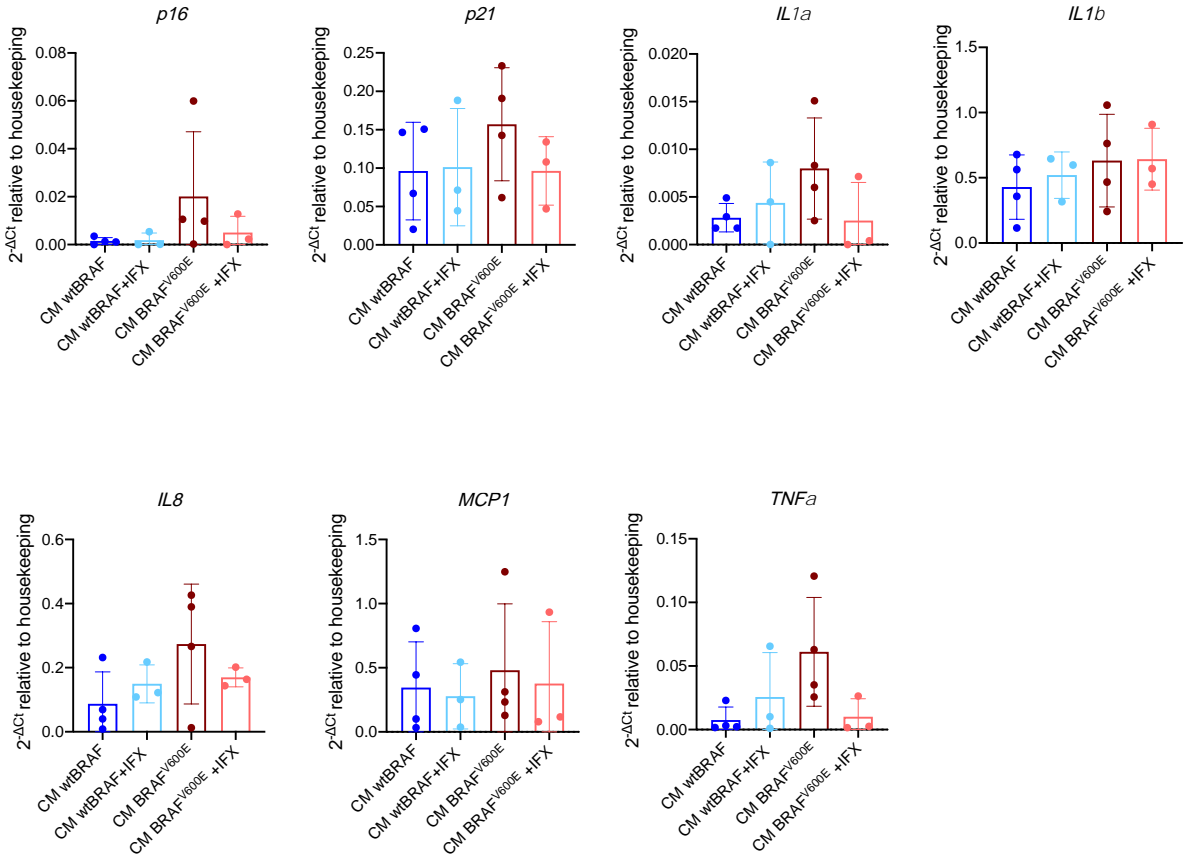**b**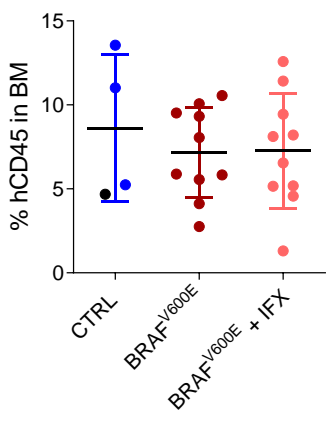**c**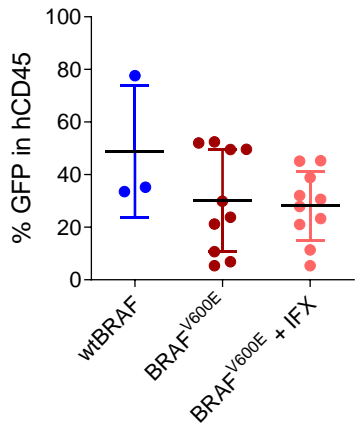

Supplementary Figure 9. Effects of TNF $\alpha$  inhibition *in vitro* and *in vivo*. a) Gene expression analysis of data in Figure 8c for senescence-associated markers in CM-treated HSPCs in presence or absence of infliximab (IFX). Data are represented as  $2^{\Delta\Delta Ct}$  relative to housekeeping gene and presented as mean value $\pm$ SD. Each dot represents an independent donor. Untreated n=4; treated n=3 biological replicates. b-c) Percentage of (b) human cells (hCD45 $^{+}$ ) or (c) GFP $^{+}$  cells in mice transplanted with CTRL (black dot indicates UT=untransduced, blue dots indicate wtBRAF-expressing HSPCs) or BRAF $^{V600E}$ -expressing cells (in presence (pink) or absence (red) of IFX). (CTRL n=4, BRAF $^{V600E}$  n=10, BRAF $^{V600E}$ +IFX n=10). Data are presented as mean value $\pm$ SD.

**a****GFP**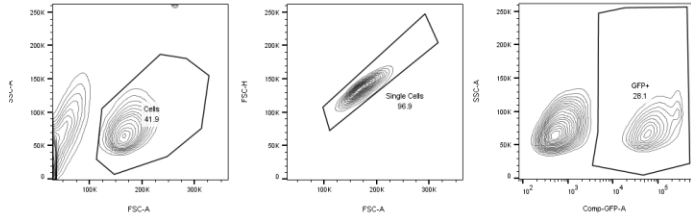**wtBRAF**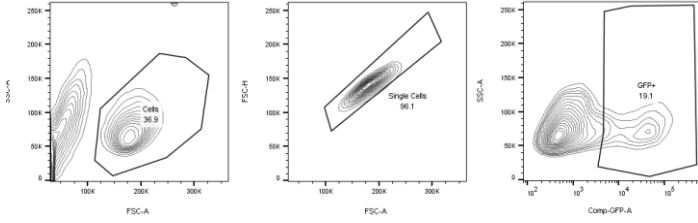**BRAF<sup>V600E</sup>**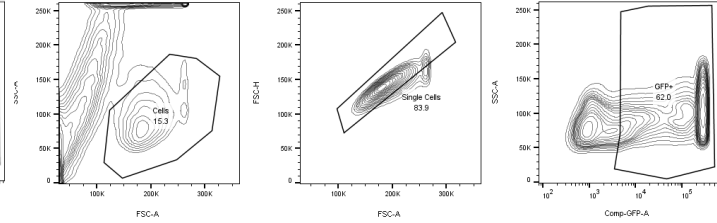**b****wtBRAF**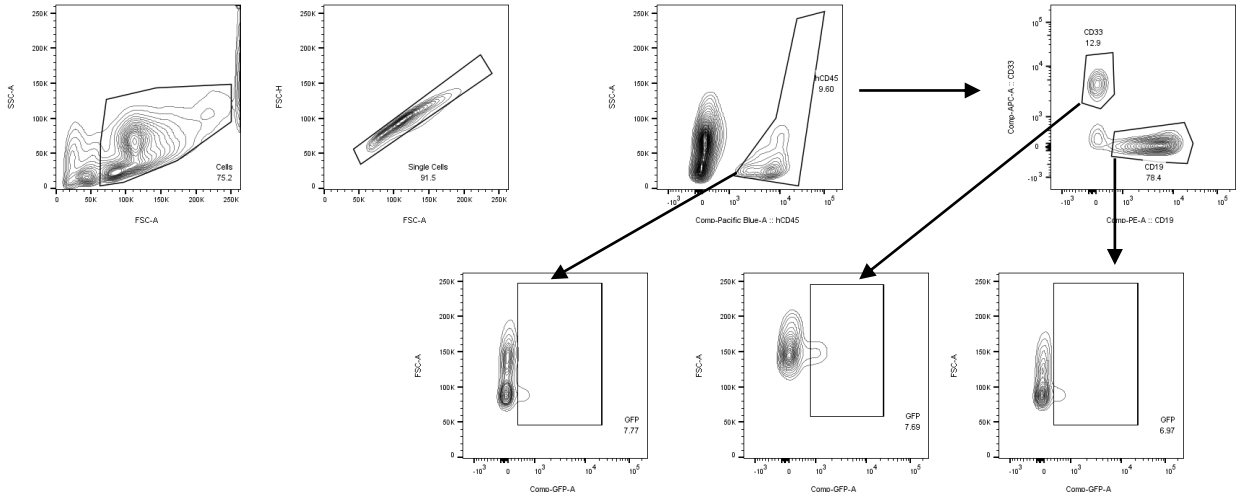**BRAF<sup>V600E</sup>**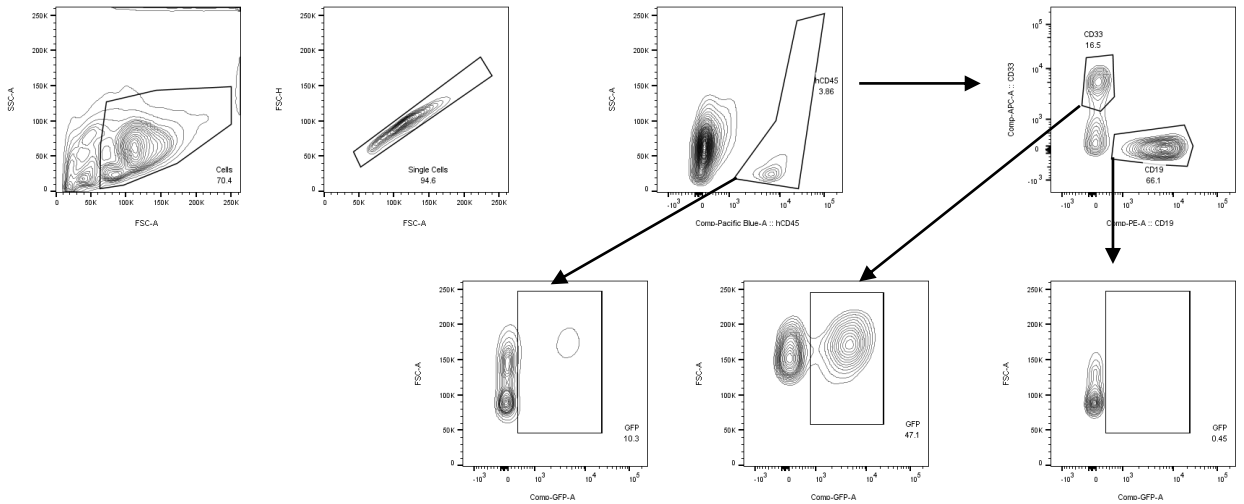

Supplementary Figure 10 Flow cytometry gating strategies for evaluation of in vitro transduction and in vivo human hematopoiesis. (a) Representative plots for GFP (green), wtBRAF (blue) and BRAF<sup>V600E</sup> (red) transduced HSPCs. The gating strategy represented in this figure corresponds to data panels in Figure 1c and 6e. (b) Representative plots for human hematopoiesis analyses of BM retrieved from mice of the wtBRAF (blue) and BRAF<sup>V600E</sup> (red) groups. The gating strategy represented in this figure corresponds to data panels in figure 2a-h, 2j, 8f-g and Supplementary Figure 2a-b, 2e-h, 3b and 9b-c.

# wtBRAF

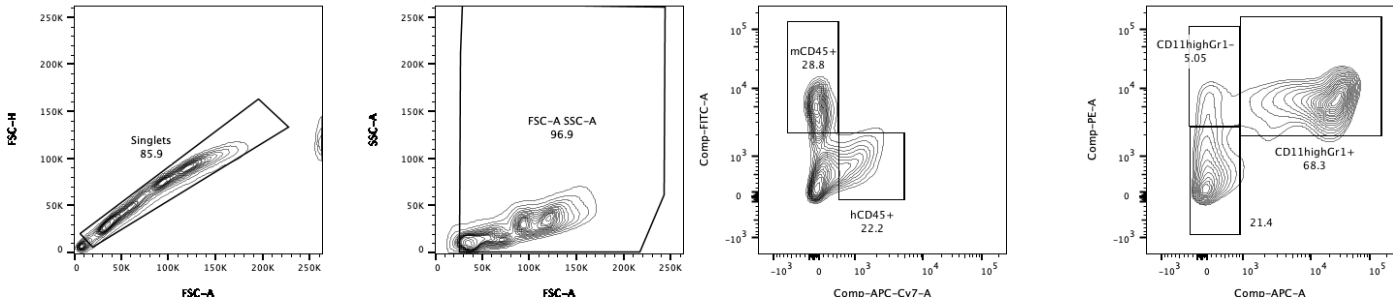

# BRAF<sup>V600E</sup>

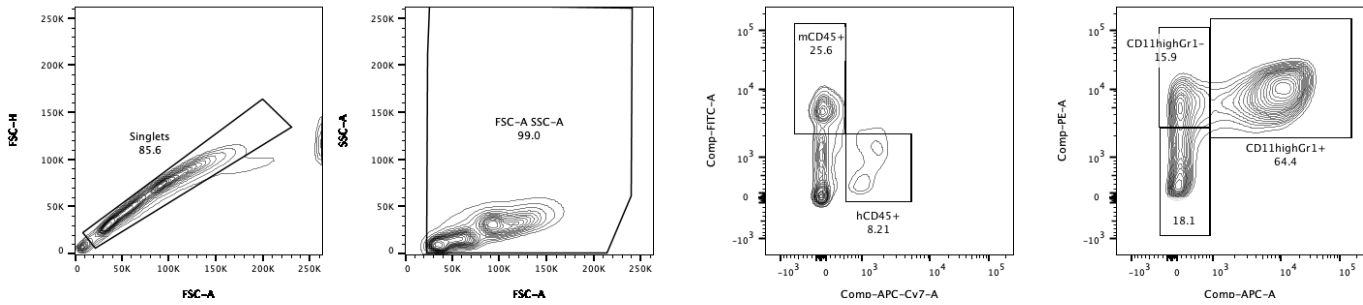

Supplementary Figure 11 Flow cytometry gating strategy for evaluation of murine hematopoiesis. Representative plots for wtBRAF (blue) and BRAF<sup>V600E</sup> (red) transduced HSPCs retrieved from BM of transplanted mice. The gating strategy represented in this figure corresponds to data panels in Supplementary Figure 2c-d.

**Supplementary Table 1. RT-qPCR Primer list**

| <b>Target</b>                 | <b>Optimal concentration of primers</b> | <b>Sequence fw</b>           | <b>Sequence rev</b>       |
|-------------------------------|-----------------------------------------|------------------------------|---------------------------|
| <i>CDKN1A</i>                 | 90 nM                                   | CAGCATGACAGATTTCTA<br>CCTC   | CTCGCGCTTCCAGGACTG        |
| <i>CDKN2A</i>                 | 160 nM                                  | CCAACGCACCGAATAGTT<br>ACG    | GCGCTGCCCATCATCATG        |
| <i>IL1<math>\alpha</math></i> | 120 nM                                  | GGTTGAGTTTAAGCCAAT<br>CCA    | TGCTGACCTAGGCTTGATGA      |
| <i>IL1<math>\beta</math></i>  | 100 nM                                  | GCTCAAGTGTCTGAAGC<br>AGCC    | CAGCTTCAAAGAACAAGTCATCCT  |
| <i>IL6</i>                    | 130 nM                                  | GATTCAATGAGGAGACTT<br>GCCTGG | CTCACTACTCTCAAATCTGTTCTGG |
| <i>IL8</i>                    | 100 nM                                  | CATCTCACTGTGTGTA<br>CATGAC   | CCTTGGCAAACACTGCACCTTCAC  |
| <i>TNF<math>\alpha</math></i> | 100 nM                                  | CCAGGGACCTCTCTCTAA<br>TCAGC  | GGTTTGCTACAACATGGGCTAC    |
| <i>MCP1</i>                   | 150 nM                                  | CTGTGATCTTCAAGACCA<br>TTGTG  | AGTTTGGGTTTGCTTGTCCAG     |
| <i>GUSB</i>                   | 350 nM                                  | CTGACACCTCCAAGTATC<br>CCAAG  | GTCGTGTACAGAAGTACAGACCGC  |
